# Supplementary material
Source: Springer Nature journal article supplement (https://www.springermedizin.de/resource/supplementary/13075_2011_3545_MOESM2_ESM.pdf/9694546)

### Sedentary Females

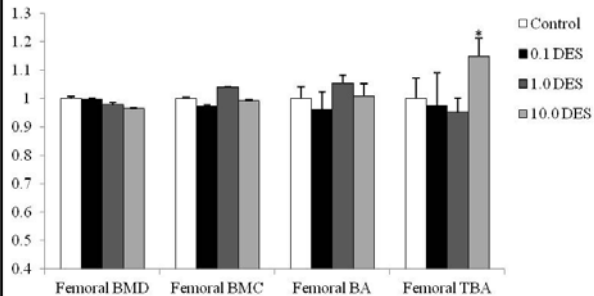

### Swim Females

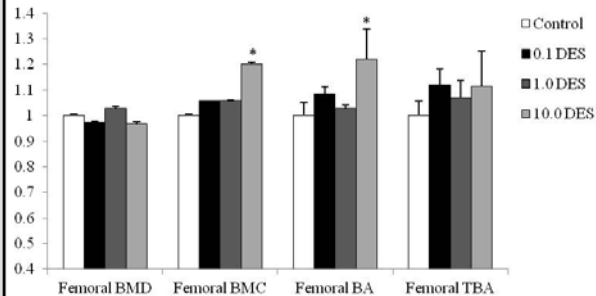

### Sedentary Males

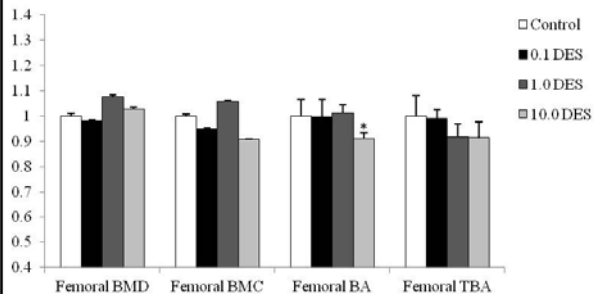

### Swim Males

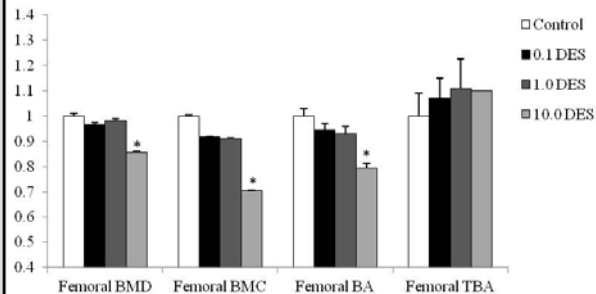

Supplement: MOESM2 [file 9694546]
